# Supplementary material
Source: Research Square preprint supplement (doi:10.21203/rs.3.rs-8460684/v1)
Supplement: Supplementary file 1 [file 0ef46b02a19f3ac4535dd427.docx]

**Table S1.** Distribution of missing data.

| Characteristics | No. of missing values | Percent (%) |
| --- | --- | --- |
| Age | 1 | 0.02 |
| Gender | 4 | 0.08 |
| Marital status | 0 | 0 |
| Educational level | 2 | 0.04 |
| Residence | 3 | 0.06 |
| Smoking status | 61 | 1.23 |
| Drinking status | 6 | 0.12 |
| Hypertension | 5 | 0.10 |
| Dyslipidemia | 97 | 1.96 |
| Cancer | 24 | 0.49 |
| WBC | 0 | 0 |
| HbA1c | 0 | 0 |
| Hemoglobin | 0 | 0 |
| LDL_C | 0 | 0 |

**Table S2.** Baseline characteristics of participants by cumulative TyG-CHR

| **Characteristic** | **Overall** | **cum TyG-CHR** | | | | ***p* value** |
| --- | --- | --- | --- | --- | --- | --- |
| **(n=4941)** | **Q1**  **(n=1235)** | **Q2**  **(n=1234)** | **Q3**  **(n=1234)** | **Q4(n=1238)** |
| Age, years (Mean±SD) | 58.58±8.46 | 57.96±8.41 | 58.51±8.46 | 58.40±8.31 | 59.47±8.58 | <0.001 |
| Gender, n (%) |  |  |  |  |  | 0.213 |
| Female | 2738 (55.41) | 705 (57.09) | 689 (55.83) | 688 (55.75) | 656 (52.99) |  |
| Male | 2203 (44.59) | 530 (42.91) | 545 (44.17) | 546 (44.25) | 582 (47.01) |  |
| Marital status, n (%) |  |  |  |  |  | 0.117 |
| Married | 4454 (90.14) | 1128 (91.34) | 1109 (89.87) | 1120 (90.76) | 1097 (88.61) |  |
| Others | 487 (9.86) | 107 (8.66) | 125 (10.13) | 114 (9.24) | 141 (11.39) |  |
| Educational level, n (%) |  |  |  |  |  | 0.141 |
| lliterate | 1415 (28.64) | 357 (28.91) | 377 (30.55) | 329 (26.66) | 352 (28.43) |  |
| Middleschoolandabove | 1497 (30.30) | 362 (29.31) | 368 (29.82) | 409 (33.14) | 358 (28.92) |  |
| Middleschoolbelow | 2029 (41.06) | 516 (41.78) | 489 (39.63) | 496 (40.19) | 528 (42.65) |  |
| Residence, n (%) |  |  |  |  |  | 0.001 |
| Urban | 791 (16.01) | 164 (13.28) | 184 (14.91) | 213 (17.26) | 230 (18.58) |  |
| Rural | 4150 (83.99) | 1071 (86.72) | 1050 (85.09) | 1021 (82.74) | 1008 (81.42) |  |
| Smoking status, n (%) |  |  |  |  |  | 0.418 |
| Never | 3503 (70.90) | 878 (71.09) | 890 (72.12) | 879 (71.23) | 856 (69.14) |  |
| Others | 1438 (29.10) | 357 (28.91) | 344 (27.88) | 355 (28.77) | 382 (30.86) |  |
| Drinking status, n (%) |  |  |  |  |  | 0.002 |
| No | 3303 (66.85) | 782 (63.32) | 810 (65.64) | 863 (69.94) | 848 (68.50) |  |
| Yes | 1638 (33.15) | 453 (36.68) | 424 (34.36) | 371 (30.06) | 390 (31.50) |  |
| Comorbidities, n (%) |  |  |  |  |  |  |
| Hypertension | 1854 (37.52) | 350 (28.34) | 433 (35.09) | 501 (40.60) | 570 (46.04) | <0.001 |
| Dyslipidemia | 464 (9.39) | 66 (5.34) | 94 (7.62) | 155 (12.56) | 149 (12.04) | <0.001 |
| Cancer | 43 (0.87) | 9 (0.73) | 12 (0.97) | 11 (0.89) | 11 (0.89) | 0.93 |
| SBP, mmHg (Mean±SD) | 128.59±19.98 | 124.86±18.68 | 127.54±19.97 | 130.05±19.96 | 131.91±20.59 | <0.001 |
| DBP, mmHg (Mean±SD) | 75.06±11.46 | 73.13±10.99 | 74.26±11.32 | 76.19±11.83 | 76.66±11.34 | <0.001 |
| BMI, kg/m2 | 24.27±35.94 | 22.08±3.12 | 23.41±3.85 | 27.04±71.57 | 24.57±3.97 | 0.005 |
| WBC, 109/L | 6.17±1.81 | 5.69±1.59 | 5.98±1.69 | 6.29±1.81 | 6.71±1.97 | <0.001 |
| HbA1c, % | 5.24±0.76 | 5.11±0.56 | 5.23±0.70 | 5.28±0.81 | 5.35±0.88 | <0.001 |
| Hemoglobin, g/dL | 14.43±2.19 | 14.11±2.05 | 14.44±2.27 | 14.58±2.07 | 14.59±2.32 | <0.001 |
| LDL-C, mg/dL | 118.10±33.83 | 115.78±31.26 | 119.22±33.60 | 120.52±34.40 | 116.90±35.72 | 0.002 |
| TG2012, mg/dL | 123.45±72.55 | 94.99±48.07 | 115.31±62.29 | 135.15±76.14 | 148.28±86.25 | <0.001 |
| TG2015, mg/dL | 134.94±80.98 | 96.02±38.97 | 122.09±55.15 | 150.64±83.52 | 170.95±107.08 | <0.001 |
| FBG2012, mg/dL | 107.15±28.50 | 102.29±18.78 | 105.19±25.45 | 107.81±28.34 | 113.31±37.14 | <0.001 |
| FBG2015, mg/dL | 99.92±28.35 | 93.26±16.21 | 97.17±22.50 | 102.95±32.72 | 106.27±35.69 | <0.001 |
| hsCRP2012, mg/L | 2.47±6.42 | 0.51±0.25 | 0.94±0.55 | 1.64±1.04 | 6.79±11.73 | <0.001 |
| hsCRP2015, mg/L | 2.59±5.43 | 0.58±0.30 | 1.23±0.54 | 2.06±0.99 | 6.47±9.76 | <0.001 |
| HDL-C2012, mg/dL | 51.52±15.10 | 60.09±15.77 | 53.23±13.83 | 48.20±12.77 | 44.55±13.15 | <0.001 |
| HDL-C2015, mg/dL | 51.89±11.85 | 58.67±12.45 | 52.92±11.40 | 49.49±9.96 | 46.49±9.80 | <0.001 |
| TyG2012 (Mean±SD) | 8.63±0.59 | 8.38±0.46 | 8.57±0.55 | 8.73±0.58 | 8.85±0.65 | <0.001 |
| TyG2015 (Mean±SD) | 8.65±0.59 | 8.32±0.40 | 8.58±0.49 | 8.80±0.58 | 8.91±0.67 | <0.001 |
| CHR2012 (Mean±SD) | 0.05±0.14 | 0.01±0.00 | 0.02±0.01 | 0.03±0.02 | 0.16±0.26 | <0.001 |
| CHR2015 (Mean±SD) | 0.06±0.14 | 0.01±0.01 | 0.02±0.01 | 0.04±0.02 | 0.15±0.26 | <0.001 |
| TyG-CHR2012 (Mean±SD) | 0.48±1.22 | 0.07±0.04 | 0.15±0.08 | 0.30±0.16 | 1.38±2.20 | <0.001 |
| TyG-CHR2015 (Mean±SD) | 0.49±1.24 | 0.08±0.04 | 0.20±0.08 | 0.37±0.16 | 1.30±2.28 | <0.001 |
| Diabetes, n (%) | 776 (15.71) | 100 (8.10) | 160 (12.97) | 232 (18.80) | 284 (22.94) | <0.001 |
| Heart disease, n (%) | 1001 (20.26) | 209 (16.92) | 238 (19.29) | 264 (21.39) | 290 (23.42) | <0.001 |
| Stroke, n (%) | 359 (7.27) | 65 (5.26) | 71 (5.75) | 105 (8.51) | 118 (9.53) | <0.001 |
| CMM, n (%) | 381 (7.71) | 55 (4.45) | 72 (5.83) | 116 (9.40) | 138 (11.15) | <0.001 |

SBP, systolic blood pressure; DBP, diastolic blood pressure; BMI, body mass index; WBC, white blood cell count; LDL-C, low-density lipoprotein cholesterol; TG, triglycerides; FBG, fasting blood glucose; hsCRP, high-sensitivity C-reactive protein; HDL-C, high-density lipoprotein cholesterol; TyG, triglyceride-glucose; CHR, ratio of hsCRP to HDL-C; TyG-CHR, triglyceride glucose-ratio of hsCRP to HDL-C ratio index; CMM, cardiometabolic multimorbidity.

**Table S3** The results of logistic regression analyses for CVD, Diabetes and Stroke

| **CVD** | | | | | | | | |
| --- | --- | --- | --- | --- | --- | --- | --- | --- |
|  | Model 1 | | Model 2 | | Model 3 | | Model 4 | |
|  | HR (95%CI) | p value | HR (95%CI) | p value | HR (95%CI) | p value | HR (95%CI) | p value |
| TyG-CHR (per 1 SD) | 1.04 (1.01, 1.09) | 0.055 | 1.00 (0.92, 1.09) | 0.041 | 1.22 (1.06, 1.48) | 0.030 | 1.34 (1.19, 1.57) | 0.005 |
| TyG-CHR quartile |  |  |  |  |  |  |  |  |
| 1 | 1(Ref) |  | 1(Ref) |  | 1(Ref) |  | 1(Ref) |  |
| 2 | 1.10 (0.86, 1.42) | 0.445 | 1.11 (0.86, 1.43) | 0.436 | 1.11 (0.86, 1.44) | 0.421 | 1.03 (0.78, 1.36) | 0.852 |
| 3 | 1.27 (0.99, 1.62) | 0.056 | 1.31 (1.02, 1.68) | 0.032 | 1.28 (0.99, 1.64) | 0.056 | 1.21 (1.03, 1.58) | 0.016 |
| 4 | 1.29 (1.01, 1.65) | 0.042 | 1.32 (1.03, 1.69) | 0.031 | 1.19 (0.93, 1.54) | 0.170 | 1.14 (1.02, 1.38) | 0.022 |
| Trend.test |  | 0.022 |  | 0.014 |  | 0.106 |  | 0.052 |
| Cumulative TyG-CHR (per 1 SD) | 1.05 (0.97, 1.13) | 0.216 | 1.06 (1.02, 1.14) | 0.015 | 1.04 (1.00, 1.12) | 0.037 | 1.05 (1.00, 1.12) | 0.001 |
| Cumulative TyG-CHR quartile |  |  |  |  |  |  |  |  |
| 1 | 1(Ref) |  | 1(Ref) |  | 1(Ref) |  | 1(Ref) |  |
| 2 | 0.94 (0.73, 1.22) | 0.643 | 0.99 (0.76, 1.28) | 0.918 | 0.99 (0.76, 1.28) | 0.922 | 1.08 (1.01, 1.32) | 0.002 |
| 3 | 1.24 (0.97, 1.58) | 0.080 | 1.29 (1.01, 1.65) | 0.042 | 1.21 (0.94, 1.56) | 0.132 | 1.23 (1.18, 1.42) | 0.001 |
| 4 | 1.33 (1.05, 1.69) | 0.020 | 1.40 (1.09, 1.78) | 0.008 | 1.30 (1.01, 1.66) | 0.042 | 1.24 (1.04, 1.45) | 0.001 |
| Trend.test |  | 0.004 |  | 0.001 |  | 0.014 |  | 0.041 |
| **Diabetes** | | | | | | | | |
|  | Model 1 | | Model 2 | | Model 3 | | Model 4 | |
|  | HR (95%CI) | p value | HR (95%CI) | p value | HR (95%CI) | p value | HR (95%CI) | p value |
| TyG-CHR (per 1 SD) | 1.08 (1.01, 1.16) | 0.035 | 1.08 (1.00, 1.16) | 0.041 | 1.07 (0.99, 1.16) | 0.085 | 1.07 (0.98, 1.16) | 0.143 |
| TyG-CHR quartile |  |  |  |  |  |  |  |  |
| 1 | 1(Ref) |  | 1(Ref) |  | 1(Ref) |  | 1(Ref) |  |
| 2 | 1.63 (1.14, 2.34) | 0.008 | 1.61 (1.12, 2.31) | 0.010 | 1.58 (1.10, 2.28) | 0.014 | 1.53 (1.03, 2.25) | 0.034 |
| 3 | 2.36 (1.68, 3.31) | <0.001 | 2.28 (1.62, 3.21) | <0.001 | 2.14 (1.51, 3.02) | <0.001 | 2.01 (1.38, 2.91) | 0.000 |
| 4 | 2.23 (1.58, 3.14) | <0.001 | 2.17 (1.54, 3.07) | <0.001 | 1.93 (1.35, 2.74) | <0.001 | 1.79 (1.21, 2.64) | 0.004 |
| Trend.test |  | <0.001 |  | <0.001 |  | <0.001 |  | 0.002 |
| Cumulative TyG-CHR (per 1 SD) | 1.14 (1.07, 1.20) | <0.001 | 1.14 (1.08, 1.21) | <0.001 | 1.14 (1.07, 1.21) | <0.001 | 1.14 (1.06, 1.22) | 0.001 |
| Cumulative TyG-CHR quartile |  |  |  |  |  |  |  |  |
| 1 | 1(Ref) |  | 1(Ref) |  | 1(Ref) |  | 1(Ref) |  |
| 2 | 1.09 (0.75, 1.59) | 0.639 | 1.05 (0.72, 1.53) | 0.816 | 0.98 (0.67, 1.43) | 0.910 | 0.88 (0.59, 1.33) | 0.547 |
| 3 | 2.18 (1.57, 3.02) | <0.001 | 2.11 (1.52, 2.92) | <0.001 | 1.97 (1.41, 2.74) | <0.001 | 1.80 (1.26, 2.57) | 0.001 |
| 4 | 2.23 (1.60, 3.09) | <0.001 | 2.16 (1.55, 3.00) | <0.001 | 1.88 (1.34, 2.63) | <0.001 | 1.84 (1.28, 2.65) | 0.001 |
| Trend.test |  | <0.001 |  | <0.001 |  | <0.001 |  | <0.001 |
| **Stroke** | | | | | | | | |
|  | Model 1 | | Model 2 | | Model 3 | | Model 4 | |
|  | HR (95%CI) | p value | HR (95%CI) | p value | HR (95%CI) | p value | HR (95%CI) | p value |
| TyG-CHR (per 1 SD) | 1.06 (0.90, 1.25) | 0.477 | 1.05 (0.89, 1.25) | 0.548 | 1.05 (1.01, 1.17) | 0.031 | 1.05 (0.99, 1.16) | 0.046 |
| TyG-CHR quartile |  |  |  |  |  |  |  |  |
| 1 | 1(Ref) |  | 1(Ref) |  | 1(Ref) |  | 1(Ref) |  |
| 2 | 2.50 (1.10, 5.69) | 0.028 | 2.46 (1.08, 5.60) | 0.032 | 1.28 (0.86, 1.93) | 0.226 | 1.45 (1.17, 1.85) | 0.010 |
| 3 | 2.13 (0.92, 4.93) | 0.079 | 2.17 (0.93, 5.04) | 0.072 | 1.28 (1.11, 1.48) | 0.023 | 1.42 (1.09, 1.71) | 0.012 |
| 4 | 4.14 (1.91, 8.98) | 0.000 | 4.01 (1.84, 8.75) | 0.001 | 1.41 (1.21, 1.87) | 0.008 | 1.57 (1.02, 2.43) | 0.043 |
| Trend.test |  | 0.000 |  | 0.001 |  | 0.107 |  | 0.007 |
| Cumulative TyG-CHR (per 1 SD) | 1.11 (1.03, 1.20) | 0.007 | 1.11 (1.02, 1.20) | 0.011 | 1.10 (1.01, 1.20) | 0.030 | 1.09 (1.00, 1.19) | 0.043 |
| Cumulative TyG-CHR quartile |  |  |  |  |  |  |  |  |
| 1 | 1(Ref) |  | 1(Ref) |  | 1(Ref) |  | 1(Ref) |  |
| 2 | 1.10 (0.73, 1.64) | 0.656 | 1.09 (0.73, 1.64) | 0.662 | 1.05 (0.70, 1.58) | 0.809 | 1.09 (1.00, 1.39) | 0.089 |
| 3 | 1.33 (0.91, 1.96) | 0.144 | 1.32 (0.90, 1.95) | 0.158 | 1.14 (1.03, 1.38) | 0.052 | 1.06 (1.01, 1.32) | 0.025 |
| 4 | 1.57 (1.08, 2.28) | 0.019 | 1.52 (1.04, 2.22) | 0.030 | 1.29 (1.09, 1.70) | 0.019 | 1.27 (1.10, 1.51) | 0.026 |
| Trend.test |  | 0.010 |  | 0.017 |  | 0.158 |  | 0.024 |

Model 1 adjusted for age and gender. Model 2 adjusted for age, gender, marital status, educational level, residence, smoking status, and drinking status. Model 3 adjusted for variables in Model 2 and history of hypertension, dyslipdemia, and cancer. Model 4 adjusted for variables in Model 3 and SBP, DBP, hba1c，Hematocrit，Hemoglobin，wbc and LDL-C

HR, hazard ratio; CI, conffdence interval; Ref, reference

**Table S4** Sensitivity analyses of the TyG-CHR on the risks of developing CMM in terms of complete data

| **Characteristic** | **Overall** | **TyG-CHR** | | | | ***p* value** |
| --- | --- | --- | --- | --- | --- | --- |
| **(n=4941)** | **Q1**  **(n=1235)** | **Q2**  **(n=1234)** | **Q3**  **(n=1234)** | **Q4**  **(n=1238)** |
| Age, years (Mean±SD) | 58.58±8.46 | 57.84±8.27 | 58.16±8.54 | 58.98±8.48 | 59.36±8.45 | <0.001 |
| Gender, n (%) |  |  |  |  |  | 0.187 |
| Female | 2738 (55.41) | 709 (57.41) | 693 (56.16) | 677 (54.86) | 659 (53.23) |  |
| Male | 2203 (44.59) | 526 (42.59) | 541 (43.84) | 557 (45.14) | 579 (46.77) |  |
| Marital status, n (%) |  |  |  |  |  | 0.506 |
| Married | 4454 (90.14) | 1119 (90.61) | 1121 (90.84) | 1110 (89.95) | 1104 (89.18) |  |
| Others | 487 (9.86) | 116 (9.39) | 113 (9.16) | 124 (10.05) | 134 (10.82) |  |
| Educational level, n (%) |  |  |  |  |  | 0.755 |
| lliterate | 1415 (28.64) | 357 (28.91) | 362 (29.34) | 344 (27.88) | 352 (28.43) |  |
| Middleschoolandabove | 1497 (30.30) | 352 (28.50) | 377 (30.55) | 383 (31.04) | 385 (31.10) |  |
| Middleschoolbelow | 2029 (41.06) | 526 (42.59) | 495 (40.11) | 507 (41.09) | 501 (40.47) |  |
| Residence, n (%) |  |  |  |  |  | <0.001 |
| Urban | 791 (16.01) | 145 (11.74) | 195 (15.80) | 217 (17.59) | 234 (18.90) |  |
| Rural | 4150 (83.99) | 1090 (88.26) | 1039 (84.20) | 1017 (82.41) | 1004 (81.10) |  |
| Smoking status, n (%) |  |  |  |  |  | 0.321 |
| Never | 3503 (70.90) | 875 (70.85) | 899 (72.85) | 867 (70.26) | 862 (69.63) |  |
| Others | 1438 (29.10) | 360 (29.15) | 335 (27.15) | 367 (29.74) | 376 (30.37) |  |
| Drinking status, n (%) |  |  |  |  |  | 0.003 |
| No | 3303 (66.85) | 795 (64.37) | 793 (64.26) | 857 (69.45) | 858 (69.31) |  |
| Yes | 1638 (33.15) | 440 (35.63) | 441 (35.74) | 377 (30.55) | 380 (30.69) |  |
| Comorbidities, n (%) |  |  |  |  |  |  |
| Hypertension | 1854 (37.52) | 367 (29.72) | 409 (33.14) | 508 (41.17) | 570 (46.04) | <0.001 |
| Dyslipidemia | 464 (9.39) | 67 (5.43) | 97 (7.86) | 145 (11.75) | 155 (12.52) | <0.001 |
| Cancer | 43 (0.87) | 8 (0.65) | 11 (0.89) | 13 (1.05) | 11 (0.89) | 0.753 |
| SBP, mmHg (Mean±SD) | 128.59±19.98 | 125.66±19.42 | 126.81±19.06 | 129.86±20.29 | 132.03±20.51 | <0.001 |
| DBP, mmHg (Mean±SD) | 75.06±11.46 | 73.36±11.21 | 74.44±11.36 | 75.72±11.69 | 76.73±11.31 | <0.001 |
| BMI, kg/m2 | 24.27±35.94 | 22.05±3.31 | 24.18±18.97 | 24.09±3.36 | 26.77±69.04 | 0.013 |
| WBC, 109/L | 6.17±1.81 | 5.69±1.58 | 5.96±1.73 | 6.20±1.73 | 6.83±1.98 | <0.001 |
| HbA1c, % | 5.24±0.76 | 5.11±0.57 | 5.20±0.66 | 5.31±0.84 | 5.35±0.89 | <0.001 |
| Hemoglobin, g/dL | 14.43±2.19 | 14.22±2.17 | 14.32±2.07 | 14.57±2.14 | 14.60±2.35 | <0.001 |
| LDL-C, mg/dL | 118.10±33.83 | 115.68±31.97 | 119.40±32.48 | 121.59±34.18 | 115.75±36.18 | <0.001 |
| TG2012, mg/dL | 123.45±72.55 | 94.55±48.58 | 113.77±58.26 | 136.60±77.44 | 148.81±86.96 | <0.001 |
| TG2015, mg/dL | 134.94±80.98 | 108.41±58.80 | 126.34±71.52 | 148.55±90.05 | 156.43±90.18 | <0.001 |
| FBG2012, mg/dL | 107.15±28.50 | 102.21±19.50 | 105.03±25.58 | 108.79±29.39 | 112.57±35.92 | <0.001 |
| FBG2015, mg/dL | 99.92±28.35 | 94.61±19.90 | 98.44±27.11 | 102.13±30.40 | 104.46±33.23 | <0.001 |
| hsCRP2012, mg/L | 2.47±6.42 | 0.40±0.14 | 0.77±0.25 | 1.46±0.54 | 7.23±11.55 | <0.001 |
| hsCRP2015, mg/L | 2.59±5.43 | 1.60±4.03 | 1.86±3.39 | 2.66±4.52 | 4.23±8.09 | <0.001 |
| HDL-C2012, mg/dL | 51.52±15.10 | 61.84±15.88 | 52.31±12.75 | 48.11±12.66 | 43.83±12.61 | <0.001 |
| HDL-C2015, mg/dL | 51.89±11.85 | 57.39±12.88 | 52.12±11.27 | 49.94±10.57 | 48.11±10.44 | <0.001 |
| TyG2012 (Mean±SD) | 8.63±0.59 | 8.37±0.48 | 8.57±0.52 | 8.75±0.60 | 8.85±0.65 | <0.001 |
| TyG2015 (Mean±SD) | 8.65±0.59 | 8.42±0.49 | 8.59±0.54 | 8.76±0.60 | 8.84±0.62 | <0.001 |
| CHR2012 (Mean±SD) | 0.05±0.14 | 0.01±0.00 | 0.01±0.00 | 0.03±0.01 | 0.17±0.25 | <0.001 |
| CHR2015 (Mean±SD) | 0.06±0.14 | 0.03±0.12 | 0.04±0.08 | 0.06±0.10 | 0.10±0.21 | <0.001 |
| TyG-CHR2012 (Mean±SD) | 0.48±1.22 | 0.06±0.02 | 0.13±0.03 | 0.26±0.06 | 1.46±2.16 | <0.001 |
| TyG-CHR2015 (Mean±SD) | 0.49±1.24 | 0.27±1.13 | 0.33±0.64 | 0.50±0.88 | 0.85±1.87 | <0.001 |
| Diabetes, n (%) | 776 (15.71) | 109 (8.83) | 170 (13.78) | 230 (18.64) | 267 (21.57) | <0.001 |
| Heart disease, n (%) | 1001 (20.26) | 209 (16.92) | 238 (19.29) | 283 (22.93) | 271 (21.89) | <0.001 |
| Stroke, n (%) | 359 (7.27) | 61 (4.94) | 82 (6.65) | 100 (8.10) | 116 (9.37) | <0.001 |
| CMM, n (%) | 381 (7.71) | 48 (3.89) | 86 (6.97) | 112 (9.08) | 135 (10.90) | <0.001 |

SBP, systolic blood pressure; DBP, diastolic blood pressure; BMI, body mass index; WBC, white blood cell count; LDL-C, low-density lipoprotein cholesterol; TG, triglycerides; FBG, fasting blood glucose; hsCRP, high-sensitivity C-reactive protein; HDL-C, high-density lipoprotein cholesterol; TyG, triglyceride-glucose; CHR, ratio of hsCRP to HDL-C; TyG-CHR, triglyceride glucose-ratio of hsCRP to HDL-C ratio index; CMM, cardiometabolic multimorbidity.

**Table S5** Sensitivity analysis of the TyG-CHR on the risks of developing CMM in participants without diabetes, heart disease or stroke at baseline (N=3,787)

|  | **Model 1** | | **Model 2** | | **Model 3** | | **Model 4** | |
| --- | --- | --- | --- | --- | --- | --- | --- | --- |
|  | **HR**  **(95%CI)** | ***P* value** | **HR**  **(95%CI)** | ***P* value** | **HR**  **(95%CI)** | ***P* value** | **HR**  **(95%CI)** | ***P* value** |
| TyG-CHR (per 1 SD) | 1.07 (1.03, 1.16) | 0.033 | 1.05 1.01, 1.16) | 0.041 | 1.14 (1.05, 1.25) | 0.001 | 1.21 (1.07, 1.35) | 0.001 |
| TyG-CHR quartile | | | | | | | | |
| 1 | 1(Ref) |  | 1(Ref) |  | 1(Ref) |  | 1(Ref) |  |
| 2 | 1.86 (1.14, 3.02) | 0.013 | 1.86 (1.14, 3.03) | 0.013 | 1.84 (1.13, 3.00) | 0.014 | 1.78 (1.05, 3.03) | 0.034 |
| 3 | 2.09 (1.30, 3.37) | 0.003 | 2.12 (1.31, 3.41) | 0.002 | 1.95 (1.21, 3.15) | 0.007 | 1.84 (1.09, 3.10) | 0.022 |
| 4 | 2.32 (1.45, 3.71) | 0.001 | 2.29 (1.43, 3.68) | 0.001 | 1.97 (1.22, 3.18) | 0.005 | 1.87 (1.10, 3.18) | 0.020 |
| Trend.test |  | <0.001 |  | <0.001 |  | 0.010 |  | 0.038 |
| Cumulative TyG-CHR (per 1 SD) | 1.09 (1.00, 1.19) | 0.059 | 1.09 (1.00, 1.20) | 0.056 | 1.16 (1.05, 1.20) | 0.034 | 1.08 (1.02, 1.20) | 0.020 |
| Cumulative TyG-CHR quartile |  |  |  |  |  |  |  |  |
| 1 | 1(Ref) |  | 1(Ref) |  | 1(Ref) |  | 1(Ref) |  |
| 2 | 0.88 (0.54, 1.44) | 0.611 | 0.88 (0.54, 1.44) | 0.611 | 0.84 (0.51, 1.37) | 0.480 | 0.85 (0.50, 1.44) | 0.538 |
| 3 | 1.80 (1.19, 2.75) | 0.006 | 1.80 (1.18, 2.75) | 0.006 | 1.60 (1.05, 2.44) | 0.030 | 1.56 (1.17, 2.50) | 0.041 |
| 4 | 1.64 (1.07, 2.52) | 0.023 | 1.62 (1.05, 2.49) | 0.028 | 1.38 (0.90, 2.13) | 0.144 | 1.37 (1.06, 2.22) | 0.019 |
| Trend.test |  | 0.001 |  | 0.002 |  | 0.022 |  | 0.044 |

Model 1 adjusted for age and gender. Model 2 adjusted for age, gender, marital status, educational level, residence, smoking status, and drinking status. Model 3 adjusted for variables in Model 2 and history of hypertension, dyslipdemia, and cancer. Model 4 adjusted for variables in Model 3 and SBP, DBP, hba1c，Hematocrit，Hemoglobin，wbc and LDL-C

HR, hazard ratio; CI, conffdence interval; Ref, reference

**Table S6** Sensitivity analyses of the TyG-CHR on the risks of developing CMM in participants without chronic disease (hypertension, dyslipidemia, cancer, diabetes, heart disease or stroke) at baseline.(N=2,391)

|  | **Model 1** | | **Model 2** | | **Model 3** | | **Model 4** | |
| --- | --- | --- | --- | --- | --- | --- | --- | --- |
|  | **HR**  **(95%CI)** | ***P* value** | **HR**  **(95%CI)** | ***P* value** | **HR**  **(95%CI)** | ***P* value** | **HR**  **(95%CI)** | ***P* value** |
| TyG-CHR (per 1 SD) | 1.06 (0.90, 1.25) | 0.477 | 1.05 (0.89, 1.25) | 0.548 | 1.08 (0.91, 1.28) | 0.375 | 1.02 (0.85, 1.22) | 0.864 |
| TyG-CHR quartile | | | | | | | | |
| 1 | 1(Ref) |  | 1(Ref) |  | 1(Ref) |  | 1(Ref) |  |
| 2 | 2.50 (1.10, 5.69) | 0.028 | 2.46 (1.08, 5.60) | 0.032 | 2.12 (0.91, 4.91) | 0.081 | 1.91 (0.82, 4.45) | 0.137 |
| 3 | 2.13 (0.92, 4.93) | 0.079 | 2.17 (0.93, 5.04) | 0.072 | 1.66 (0.68, 4.01) | 0.263 | 1.45 (0.59, 3.53) | 0.415 |
| 4 | 4.14 (1.91, 8.98) | <0.001 | 4.01 (1.84, 8.75) | 0.001 | 3.93 (1.79, 8.62) | 0.001 | 3.28 (1.47, 7.33) | 0.004 |
| Trend.test |  | <0.001 |  | <0.001 |  | <0.001 |  | 0.004 |
| Cumulative TyG-CHR (per 1 SD) | 1.14 (1.05, 1.25) | 0.004 | 1.15 (1.05, 1.27) | 0.003 | 1.16 (1.06, 1.27) | 0.001 | 1.14 (1.03, 1.26) | 0.012 |
| Cumulative TyG-CHR quartile |  |  |  |  |  |  |  |  |
| 1 | 1(Ref) |  | 1(Ref) |  | 1(Ref) |  | 1(Ref) |  |
| 2 | 0.80 (0.37, 1.71) | 0.561 | 0.79 (0.37, 1.70) | 0.553 | 0.62 (0.26, 1.51) | 0.296 | 0.57 (0.23, 1.37) | 0.207 |
| 3 | 1.53 (0.80, 2.93) | 0.202 | 1.55 (0.80, 2.97) | 0.191 | 1.75 (0.88, 3.49) | 0.112 | 1.56 (1.03, 3.13) | 0.021 |
| 4 | 1.87 (1.00, 3.51) | 0.051 | 1.82 (0.97, 3.44) | 0.064 | 2.08 (1.06, 4.06) | 0.033 | 1.70 (1.14, 3.40) | 0.013 |
| Trend.test |  | 0.012 |  | 0.016 |  | 0.004 |  | 0.024 |

Model 1 adjusted for age and gender. Model 2 adjusted for age, gender, marital status, educational level, residence, smoking status, and drinking status. Model 3 adjusted for variables in Model 2 and history of hypertension, dyslipdemia, and cancer. Model 4 adjusted for variables in Model 3 and SBP, DBP, hba1c，Hematocrit，Hemoglobin，wbc and LDL-C

HR, hazard ratio; CI, conffdence interval; Ref, reference
